# Supplementary material for: Tumor-Stroma Co-Cultures Modify the Invasive Properties of Human Pancreatic Adenocarcinoma Cells Through Different Patterns of Cytokine Secretion and Depending on the Type of Cell Lines.
Source: Research Square preprint supplement (doi:10.21203/rs.3.rs-152450/v1), 2021-01-25

**Supplementary Figure 1** Photographs of phase contrast and fluorescence microscopy of the selection of Fibroblasts LC5-GFP+ after FACS Sorting. The percentage of GFP expressing fibroblasts was higher than 97%.


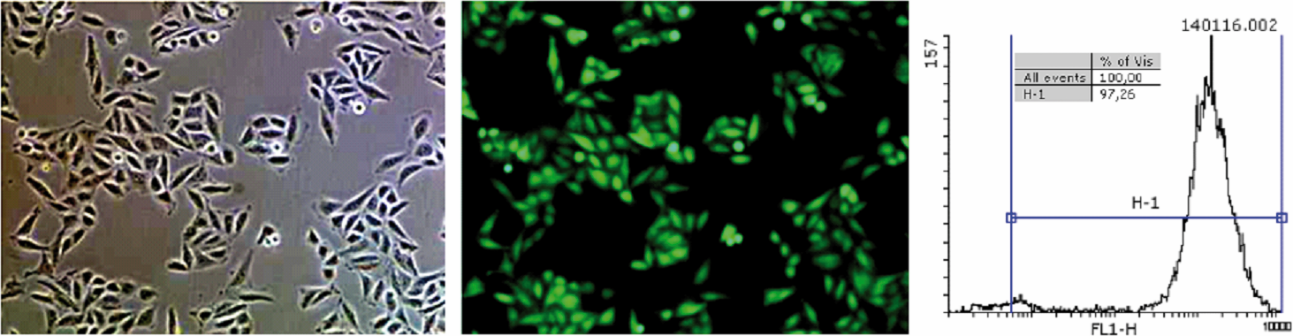

Supplement: Supplementary file 1 [file d92b9e175f7486ce237fe752.docx]
